# Supplementary material for: Machine learning-based feature selection and classification for cerebral infarction screening: an experimental study
Source: PeerJ Comput Sci. 2025 Feb 21;11:e2704. doi: 10.7717/peerj-cs.2704 (PMC11888919; doi:10.7717/peerj-cs.2704)
Supplement: Supplemental Information 1 [file peerj-cs-11-2704-s001.xlsx]

## Sheet: Sheet1
data	sex	age	education	M1（executive function）	M2（immediate memory ）	M3（fluency ）	M4_1（orienteering 1）	M4_2（orienteering 2）	M4_3（orienteering 3）	M4_4（orienteering 4）	M4_5（orienteering 5）	M4_6（orienteering 6）	M5（calculate）	M6（abstraction）	M7（Delayed recall）	M8（visual perception ）	M9（naming）	M10（attention 1）	M11（attention 2）	M12（attention3 ）	F0semitoneFrom27.5Hz_sma3nz_amean	F0semitoneFrom27.5Hz_sma3nz_stddevNorm	F0semitoneFrom27.5Hz_sma3nz_percentile20.0	F0semitoneFrom27.5Hz_sma3nz_percentile50.0	F0semitoneFrom27.5Hz_sma3nz_percentile80.0	F0semitoneFrom27.5Hz_sma3nz_pctlrange02	F0semitoneFrom27.5Hz_sma3nz_meanRisingSlope	F0semitoneFrom27.5Hz_sma3nz_stddevRisingSlope	F0semitoneFrom27.5Hz_sma3nz_meanFallingSlope	F0semitoneFrom27.5Hz_sma3nz_stddevFallingSlope	loudness_sma3_amean	loudness_sma3_stddevNorm	loudness_sma3_percentile20.0	loudness_sma3_percentile50.0	loudness_sma3_percentile80.0	loudness_sma3_pctlrange02	loudness_sma3_meanRisingSlope	loudness_sma3_stddevRisingSlope	loudness_sma3_meanFallingSlope	loudness_sma3_stddevFallingSlope	spectralFlux_sma3_amean	spectralFlux_sma3_stddevNorm	mfcc1_sma3_amean	mfcc1_sma3_stddevNorm	mfcc2_sma3_amean	mfcc2_sma3_stddevNorm	mfcc3_sma3_amean	mfcc3_sma3_stddevNorm	mfcc4_sma3_amean
2018.02.06	male	62	#NULL!	1	0	1	1	1	1	1	1	1	1	3	5	2	3	1	2	3	26.3079	0.227028	21.8689	25.0856	30.4585	8.58963	245.851	476.382	31.0214	24.8573	0.179582	1.0056	0.0572803	0.114602	0.259055	0.201775	3.32064	2.86672	3.25317	3.12898	0.0527915	1.25673	23.4129	0.541181	9.61818	1.19732	12.0925	0.949409	-4.19758
43803	female	61	7	0	#NULL!	1	1	1	1	1	1	1	0	0	4	0	2	1	2	3	0.173883	24.3005	26.7273	30.2119	5.9114	152.498	193.373	80.0282	131.984	0.479246	1.34181	0.0319706	0.13935	0.906748	0.874777	11.3819	8.24148	8.01258	6.50085	0.254843	1.70354	16.5139	1.10716	4.31643	3.24838	0.476585	26.6016	-3.49416	-3.39922
43399	male	63	12	0	0	1	1	1	1	1	1	1	2	2	0	2	4	1	2	3	32.5461	0.115152	29.6908	32.7746	35.967	6.27621	206.333	293.44	27.4396	26.2663	0.357535	1.10331	0.0930477	0.196785	0.549294	0.456246	8.60162	6.76443	6.6935	5.79938	0.167932	1.69452	24.786	0.504598	7.26061	1.23568	-0.980295	-9.598	-1.68831
43453	male	69	12	0	0	1	1	1	1	1	1	1	3	2	2	1	4	1	2	3	31.2833	0.165875	25.9295	32.083	36.0603	10.1308	232.816	388.957	27.887	22.0484	0.573348	0.865389	0.228035	0.358075	0.864926	0.636891	10.6605	8.79281	7.6718	6.67137	0.382775	1.27823	35.5946	0.231404	6.37427	1.45385	5.82106	1.79212	-3.17389
43796	female	57	10	1	#NULL!	2	1	1	1	1	0	1	3	2	5	2	3	1	2	3	0.219648	24.9319	31.2773	34.5188	9.58686	317.02	695.013	102.053	119.019	0.327892	1.37062	0.0278805	0.0906257	0.627983	0.600103	11.4219	8.10724	8.03666	6.1951	0.197722	1.8163	18.9125	0.931636	13.1507	0.929644	2.1441	6.13082	-4.96864	-2.0095
2018.03.12	female	#NULL!	#NULL!	0	0	1	1	1	1	1	1	1	1	2	5	3	3	1	2	3	34.5655	0.122777	31.3837	34.7873	38.0628	6.6791	172.487	241.283	75.947	106.768	0.0994283	0.889131	0.0314996	0.0647507	0.160535	0.129035	1.89404	1.49586	1.41247	1.22802	0.0397292	2.68605	22.5748	0.436483	15.0376	0.542575	10.92	1.05028	5.69748
2018.02.10	female	#NULL!	#NULL!	1	0	2	1	1	1	1	1	1	3	3	5	3	4	1	2	3	33.323	0.136611	30.8521	33.1724	37.3212	6.4691	189.128	243.873	46.3003	55.9655	0.0845907	0.814684	0.0376098	0.0445262	0.131991	0.0943811	1.6321	1.17285	0.96638	0.752197	0.0221211	1.06046	30.2511	0.285749	9.42907	0.973798	-3.42851	-2.52325	0.772475
43537	female	53	15	1	0	2	1	1	1	1	1	1	0	3	4	3	3	1	2	3	#NULL!	#NULL!	#NULL!	#NULL!	#NULL!	#NULL!	#NULL!	#NULL!	#NULL!	#NULL!	#NULL!	#NULL!	#NULL!	#NULL!	#NULL!	#NULL!	#NULL!	#NULL!	#NULL!	#NULL!	#NULL!	#NULL!	#NULL!	#NULL!	#NULL!	#NULL!	#NULL!	#NULL!	#NULL!
43558		82	12	1	0	1	1	1	1	1	1	1	1	2	1	2	4	0	2	2	0.268846	20.2857	26.1848	34.9961	14.7104	326.446	464.429	63.7536	56.7677	0.428939	0.624896	0.267675	0.329028	0.530213	0.262538	5.29912	5.1291	2.89954	2.91736	0.212347	1.12396	28.7197	0.303098	-0.831655	-9.63258	7.91886	0.990347	3.29939	2.38673
43789	female	51	11	1	#NULL!	2	1	1	1	1	1	1	3	2	5	2	4	1	2	3	0.207263	24.954	28.2836	32.1304	7.17636	185.542	204.351	114.678	135.753	0.385916	1.18032	0.0533943	0.187043	0.678077	0.624683	7.51008	5.61396	5.19215	4.89628	0.195318	1.66373	16.7728	1.14471	11.5217	1.1965	6.77635	2.06425	1.64792	6.98445
2018.02.01	female	66	#NULL!	0	0	2	0	1	1	1	1	1	3	2	5	2	4	1	2	3	38.4222	0.185067	34.4226	38.7602	44.4166	9.99392	242.371	273.547	120.075	122.636	0.146135	0.630448	0.0682957	0.123373	0.204801	0.136506	1.69099	1.25405	1.24467	1.04889	0.0520141	0.872557	28.2647	0.329339	10.8748	0.864552	3.9372	2.65917	-7.32324
43579	male	#NULL!	12	1	0	1	1	1	1	1	1	1	3	2	2	2	4	1	2	3	0.142593	23.0743	25.5645	28.6564	5.58207	151.388	194.235	58.4531	56.6071	0.658027	0.663826	0.287536	0.539346	0.963245	0.67571	9.77508	8.15903	7.14297	7.70537	0.507852	1.08316	34.8097	0.289544	9.7996	0.893081	6.09225	1.66818	-4.79492	-2.17465
43406	female	64	6	0	0	#NULL!	1	1	1	1	1	1	1	2	5	2	4	1	2	3	32.1399	0.136487	28.0272	32.8846	36.157	8.12982	184.879	297.06	43.067	83.4414	0.427884	0.974546	0.117326	0.260411	0.688199	0.570873	7.66257	5.354	5.91709	5.06103	0.20312	1.41309	26.6425	0.543095	10.2672	1.08903	-2.06568	-5.6909	-1.47004
43319	male	73	12	1	0	1	1	1	1	1	1	1	3	2	5	2	4	1	0	1	29.0722	0.210718	24.0737	26.6769	35.1974	11.1236	209.785	344.718	36.0884	40.7033	0.0522451	0.525073	0.0286991	0.0441064	0.0725652	0.0438661	0.534717	0.36451	0.368679	0.293413	0.00864752	0.743509	23.8334	0.359318	12.7859	0.660792	2.73471	3.83479	11.1081
2018.02.03	male	62	#NULL!	0	0	0	1	1	1	1	1	1	1	2	4	2	4	1	2	3	30.4291	0.203822	24.3123	28.6606	36.9437	12.6314	225.655	376.18	64.9288	214.948	0.245643	1.31123	0.0543142	0.117496	0.373463	0.319149	6.7796	5.95529	4.53681	4.11067	0.10477	1.80953	31.3518	0.315285	7.0576	1.34373	0.839993	15.328	-1.41956
43390	female	84	1	0	0	0	0	0	0	0	1	1	0	1	0	0	2	0	0	0	31.4053	0.140149	28.0504	31.6886	34.2933	6.24284	365.665	347.46	121.696	184.593	0.414376	0.348535	0.31283	0.380433	0.487599	0.174769	2.36923	2.64457	1.12157	0.880525	0.16063	0.528177	18.8913	0.353165	17.7727	0.397728	-6.24224	-1.11062	-0.105364
43796	female	64	15	1	#NULL!	2	1	1	1	1	1	1	3	3	3	2	4	1	2	3	0.137593	26.6616	29.6761	33.0558	6.39418	170.616	343.03	65.5823	124.839	0.601336	1.10375	0.0328425	0.342502	1.16842	1.13558	12.7145	8.61381	9.13931	6.79044	0.313033	1.31891	20.4338	0.819113	14.5296	0.92715	5.64969	2.36098	-3.87865	-3.13316
43409	male	72	7	0	0	#NULL!	1	0	1	1	1	1	2	2	3	2	4	0	0	0	33.7009	0.132758	29.9472	33.7897	37.5865	7.63938	165.34	297.595	48.1132	131.524	0.62667	0.868308	0.161819	0.424816	1.08406	0.922243	8.27362	5.82315	6.55913	4.86106	0.343241	1.23513	28.843	0.522582	5.26992	2.4558	-3.73629	-3.46527	-5.89851
43798	male	62	12	1	#NULL!	1	1	1	1	1	0	1	1	1	4	2	3	1	2	3	0.215841	22.1209	24.6757	28.2599	6.13905	347.608	563.6	83.1976	203.461	0.409493	1.30298	0.0325143	0.121948	0.805215	0.772701	10.0619	6.47767	7.14942	5.46866	0.21987	1.74316	17.4472	1.13807	3.39878	3.92398	0.193757	65.8397	3.3301	3.48587
43335	female	66	6	1	0	1	1	1	1	1	1	1	2	3	2	2	4	1	2	3	36.0542	0.143909	31.0494	36.7658	40.3287	9.27924	207.376	302.96	47.15	64.8009	0.0483714	0.796036	0.0221488	0.029317	0.0738938	0.0517449	0.818022	0.634799	0.589252	0.528589	0.00777313	1.08977	21.2126	0.431989	8.5356	1.02589	3.15801	2.91104	6.76068
43413	female	67	9	0	0	1	1	1	1	1	1	1	2	3	2	3	4	1	2	3	33.2079	0.131424	29.1972	34.0723	36.8223	7.62513	174.736	321.251	37.0281	47.8784	0.484209	1.00192	0.0817741	0.309783	0.805487	0.723713	8.94523	7.69821	6.12328	5.18217	0.254108	1.27977	27.0044	0.483685	10.1711	1.05183	0.605279	19.4236	-6.48564
43348	male	#NULL!	9	0	0	1	1	1	1	1	1	1	3	2	4	2	4	1	2	3	30.0954	0.174951	25.1942	29.2721	35.0861	9.89193	222.556	360.851	54.2421	100.047	0.117829	0.68774	0.043223	0.0976197	0.181559	0.138336	1.63639	1.08994	1.12784	0.84243	0.0271703	0.963576	32.132	0.290461	2.52979	3.7226	8.1991	1.66502	-0.887076
43398	female	66	5	0	0	1	1	1	1	1	1	1	3	1	4	0	4	1	0	1	33.2817	0.137344	29.8196	33.8254	37.0474	7.2278	190.078	254.321	53.0684	95.3809	0.517479	0.81694	0.136288	0.409675	0.833552	0.697264	7.9906	5.38778	6.16541	4.63745	0.291555	1.13126	28.5916	0.511853	13.9508	0.920415	0.489571	23.7086	-6.76809
2018.04.24	female	68	#NULL!	0	0	2	1	1	1	1	1	1	3	1	4	2	4	1	2	3	33.8142	0.128937	30.4245	33.9062	37.4062	6.98171	299.856	460.42	35.6673	35.7705	0.135715	1.0677	0.0361223	0.0699254	0.213124	0.177002	2.78323	2.14943	2.17501	2.08788	0.0405907	1.28131	20.049	0.581468	11.5305	0.746959	7.12193	1.4756	1.32996
43454	female	66	12	0	0	1	1	1	1	1	1	1	0	2	2	1	4	1	2	3	33.4805	0.110376	30.9088	33.3691	36.5036	5.5948	232.206	433.683	45.67	53.6516	0.538105	0.571596	0.257044	0.475645	0.766672	0.509628	6.81582	5.80965	4.52396	3.61995	0.29676	0.819865	35.7197	0.247003	7.11928	1.42854	4.12059	2.70571	-7.5769
43328	female	60	6	0	0	1	1	1	1	1	1	1	2	2	3	2	4	1	2	3	32.2612	0.150626	28.5773	31.644	36.9684	8.39115	251.852	394.11	36.4373	58.4571	0.423403	0.641432	0.194035	0.333614	0.639482	0.445447	4.84074	4.03163	2.90509	2.19662	0.252032	1.0408	32.948	0.267788	6.55292	1.47609	9.8256	0.896513	5.55018
43454	female	56	9	1	0	2	1	1	1	1	1	1	2	0	4	2	4	1	2	3	35.6044	0.107218	32.5273	35.4959	38.6286	6.10133	200.193	321.313	48.0376	62.1385	0.872737	0.635645	0.392087	0.770234	1.24344	0.851356	11.8914	8.9078	7.94459	6.35192	0.600205	0.941321	32.2698	0.345994	5.85207	2.07457	6.84748	2.00251	-12.9991
2018.01.31	male	63	#NULL!	1	0	1	1	1	1	1	1	1	1	3	5	2	4	1	2	3	29.0771	0.18524	25.597	27.8506	34.6221	9.0251	173.481	278.909	72.9975	104.733	0.11313	0.729994	0.0500064	0.0803293	0.166118	0.116112	1.64584	1.53676	1.49207	1.24963	0.037752	0.94719	28.4802	0.365039	14.0285	0.677821	2.06933	4.46179	3.29916
43383	female	70	3	0	0	0	0	1	1	0	0	1	1	1	3	2	2	0	0	0	34.4256	0.115534	31.6822	34.1157	37.6212	5.93905	191.249	357.947	43.9367	51.6651	0.757384	0.705827	0.291779	0.616085	1.123	0.831218	10.9025	9.30494	7.68838	5.8566	0.608693	0.99109	39.4003	0.222412	10.1627	0.923744	7.09013	1.47904	-2.90315
43396	female	60	12	0	0	2	1	1	1	1	1	1	2	2	3	2	4	1	2	3	35.3491	0.111776	32.2369	34.9694	38.9283	6.69135	163.891	261.7	37.9981	59.563	0.430224	0.832496	0.126804	0.31521	0.697862	0.571058	6.83552	4.71055	4.88216	3.28816	0.187037	1.18993	21.4948	0.621468	7.42241	1.61625	5.10721	2.14598	-1.73837
43782	female	83	12	0	#NULL!	2	1	1	1	0	1	1	0	3	0	2	4	1	2	3	0.207747	27.7915	30.5505	32.9253	5.13381	212.156	456.505	98.8997	142.264	0.437589	1.07434	0.048376	0.271682	0.774354	0.725978	8.91129	6.27035	6.24457	4.07328	0.248969	1.44569	19.9658	0.980753	8.31717	1.91921	3.54217	4.86622	-0.0245349	-513.654
2018.02.27		#NULL!	6	0	0	0	1	1	1	0	1	1	0	0	5	0	4	1	0	1	36.2253	0.128379	32.5919	36.2626	40.2004	7.60855	180.056	399.537	92.9864	277.211	0.501322	0.819907	0.184401	0.353236	0.762502	0.578101	8.59098	7.27626	5.32931	4.39861	0.298989	1.21894	36.8273	0.21755	4.60029	1.92185	-1.49501	-7.49712	-5.46411
43656	female	#NULL!	6	0	0	0	1	1	1	1	1	1	0	1	2	1	3	1	0	1	0.189964	24.6881	31.0116	36.4232	11.7351	157.638	234.009	34.3002	26.7657	0.548131	0.864874	0.262988	0.308272	0.781714	0.518726	11.5592	9.4352	8.26964	7.64377	0.387393	1.34367	38.3299	0.188388	6.8589	1.11677	2.34457	3.86667	-4.64098	-2.28514
43615	female	65	9	1	0	2	0	1	1	1	1	1	3	3	1	2	4	1	0	1	#NULL!	#NULL!	#NULL!	#NULL!	#NULL!	#NULL!	#NULL!	#NULL!	#NULL!	#NULL!	#NULL!	#NULL!	#NULL!	#NULL!	#NULL!	#NULL!	#NULL!	#NULL!	#NULL!	#NULL!	#NULL!	#NULL!	#NULL!	#NULL!	#NULL!	#NULL!	#NULL!	#NULL!	#NULL!
43399	female	67	12	0	0	1	1	1	1	1	1	1	2	3	2	3	3	0	2	2	31.7692	0.132064	27.9256	31.9272	35.7561	7.83048	141.33	243.043	29.0938	25.7743	0.586829	0.819711	0.173852	0.422465	0.973579	0.799727	8.26786	5.34201	6.47515	5.22892	0.310831	1.07347	29.1098	0.497308	9.36551	1.13173	2.6305	4.31626	-5.27224
43670	female	71	1	0	0	0	1	1	1	1	1	1	3	0	4	2	3	0	0	0	0.15539	28.1954	32.9271	37.1213	8.92596	154.341	179.309	105.871	262.141	0.515948	1.12573	0.0287934	0.292716	0.983507	0.954714	12.996	8.37948	8.71841	5.63791	0.344116	1.38653	29.6619	0.475794	2.38666	5.94327	4.74529	3.39028	-9.9054	-1.77149
43747	female	68	9	1	0	1	1	1	1	0	1	1	1	1	3	3	3	1	2	3	0.125469	27.6286	29.7414	31.9909	4.36223	279.155	481.717	72.038	92.7378	0.134177	1.07045	0.036384	0.0633971	0.225308	0.188924	3.47335	5.30967	1.96164	1.80045	0.0627254	1.58034	35.7782	0.355521	10.1394	1.21377	0.245475	58.5908	-4.77046	-3.00473
43384	female	63	9	0	0	1	1	1	1	0	1	1	3	0	5	2	3	1	2	3	34.5343	0.104438	32.3488	34.6083	37.3357	4.98684	109.742	130.706	31.9168	29.2951	0.736284	0.667507	0.306508	0.586426	1.1021	0.795587	9.34424	6.06039	6.98617	5.2321	0.543908	0.878008	40.479	0.205793	8.67712	1.12776	5.30999	2.06115	-4.06302
43747	female	70	12	0	0	1	1	1	1	1	0	1	0	3	0	2	3	1	2	3	0.14102	27.7589	29.9161	32.1601	4.40122	180.417	262.247	65.1118	73.1703	0.111362	0.836933	0.0447571	0.0630896	0.177504	0.132747	1.94065	1.56323	1.4282	1.39662	0.0483002	1.3252	31.6042	0.393493	12.0932	0.952719	9.36576	1.31409	-3.96908	-2.7848
43803	female	64	5	1	#NULL!	1	1	1	1	1	1	1	1	1	5	1	4	0	2	2	0.153313	25.7549	29.9114	33.5249	7.77002	314.327	608.883	55.7679	85.6715	0.482038	1.35996	0.0293588	0.15995	0.875582	0.846223	9.07903	6.56966	6.82237	5.73846	0.2557	1.71077	19.5022	0.902158	6.6253	2.03052	1.46599	9.15682	-3.02435	-4.2397
43824	female	64	9	0	#NULL!	1	1	1	1	1	1	1	3	2	3	1	3	1	0	1	0.194691	25.9256	33.5645	36.4364	10.5108	387.188	544.516	65.688	104.999	0.428681	1.21911	0.0364719	0.213246	0.770846	0.734374	10.5036	7.67996	8.17174	7.05859	0.245829	1.76302	17.1759	1.01287	5.77924	2.50506	4.77312	2.83527	-0.990317	-14.1303
2018.03.27	female	71	5	0	0	1	0	1	1	1	1	1	1	2	5	1	4	1	2	3	#NULL!	#NULL!	#NULL!	#NULL!	#NULL!	#NULL!	#NULL!	#NULL!	#NULL!	#NULL!	#NULL!	#NULL!	#NULL!	#NULL!	#NULL!	#NULL!	#NULL!	#NULL!	#NULL!	#NULL!	#NULL!	#NULL!	#NULL!	#NULL!	#NULL!	#NULL!	#NULL!	#NULL!	#NULL!
43402	female	58	12	0	0	1	1	1	1	1	1	1	2	3	5	2	4	1	2	3	31.9886	0.140652	28.9269	31.1861	35.3774	6.45055	191.601	397.838	49.4484	106.127	0.488561	0.85861	0.126957	0.339193	0.822083	0.695126	7.49726	4.7462	5.80089	4.62187	0.20422	1.11245	26.0975	0.575972	9.51444	1.15288	3.09569	4.38491	-1.69751
43453	female	70	9	0	0	1	1	1	1	0	1	1	0	1	2	2	4	1	0	1	35.1273	0.100814	32.3596	35.3657	37.9238	5.56419	209.736	362.797	52.6216	71.1431	0.564047	0.827597	0.195576	0.397184	0.860693	0.665117	10.9849	8.87647	7.54774	7.65447	0.409932	1.21301	35.0145	0.283378	10.2106	0.996669	5.53672	1.84465	-3.41149
43326	male	67	9	1	0	1	1	1	1	1	1	1	3	2	4	2	4	1	2	3	32.3924	0.17599	27.6936	30.7587	38.0473	10.3538	287.705	376.933	74.8991	139.264	0.536036	0.666078	0.218812	0.448637	0.804734	0.585922	7.14021	5.03143	4.01549	2.68881	0.410616	1.04326	35.1083	0.25926	6.10628	1.50346	8.4288	1.23931	5.9703
43537	male	61	12	1	0	1	1	1	1	1	1	1	0	2	4	1	4	1	2	3	#NULL!	#NULL!	#NULL!	#NULL!	#NULL!	#NULL!	#NULL!	#NULL!	#NULL!	#NULL!	#NULL!	#NULL!	#NULL!	#NULL!	#NULL!	#NULL!	#NULL!	#NULL!	#NULL!	#NULL!	#NULL!	#NULL!	#NULL!	#NULL!	#NULL!	#NULL!	#NULL!	#NULL!	#NULL!
2018.02.27	female	70	#NULL!	0	0	1	1	1	1	1	1	1	1	0	4	2	3	1	2	3	33.1548	0.120852	30.1394	33.3296	36.0608	5.92139	104.201	168.493	41.2793	50.148	0.672313	0.780548	0.19946	0.535121	1.07258	0.873122	10.8994	7.47343	6.76259	5.34234	0.403297	1.04012	30.7085	0.354355	5.86563	2.28743	6.05964	2.26459	2.97257
2018.04.20	female	76	#NULL!	1	0	1	1	1	1	1	1	1	1	2	3	3	4	1	2	3	29.8957	0.193343	24.6117	29.5994	35.4813	10.8696	265.859	451.326	49.5848	64.8792	0.164175	0.802477	0.0547511	0.123489	0.253255	0.198503	2.57186	1.86897	1.8447	1.56344	0.0559274	0.895406	22.4606	0.533081	9.34882	1.27997	9.84323	1.27116	5.90244
43391	male	62	10	1	0	1	0	1	1	1	1	1	3	3	3	3	4	1	2	3	32.8448	0.173861	26.4472	34.4143	37.8736	11.4265	124.043	209.271	42.3526	77.2691	0.36678	0.795639	0.142716	0.260682	0.542468	0.399753	5.71263	4.07553	3.94441	4.65358	0.144982	1.2065	23.1916	0.506623	5.96969	1.78499	4.74669	2.18049	-2.56224
43334		#NULL!	10	0	0	2	1	1	1	1	1	1	2	2	0	2	4	1	1	2	30.1321	0.274037	22.323	26.0041	38.7792	16.4561	213.418	270.452	55.501	98.5919	0.0582968	0.854896	0.0193422	0.0379356	0.0941979	0.0748557	1.05764	0.80603	0.646798	0.51909	0.0105759	1.21833	20.5541	0.536247	10.2328	0.968912	6.69938	1.5493	11.3142
43607	female	73	6	1	0	1	0	1	1	1	1	1	0	3	0	2	4	1	0	1	#NULL!	#NULL!	#NULL!	#NULL!	#NULL!	#NULL!	#NULL!	#NULL!	#NULL!	#NULL!	#NULL!	#NULL!	#NULL!	#NULL!	#NULL!	#NULL!	#NULL!	#NULL!	#NULL!	#NULL!	#NULL!	#NULL!	#NULL!	#NULL!	#NULL!	#NULL!	#NULL!	#NULL!	#NULL!
43733	female	64	9	1	0	0	1	1	1	1	1	1	1	1	4	3	3	1	2	3	0.15699	28.4303	33.0631	37.2563	8.82603	245.673	391.381	72.4017	135.57	0.13625	1.06483	0.032369	0.0664076	0.240072	0.207703	2.87975	2.45827	1.89939	1.46677	0.0669323	1.53457	31.3106	0.434218	5.79579	2.43179	4.26372	3.36334	-2.63493	-4.87534
2018.03.15		#NULL!	#NULL!	0	0	0	1	1	1	1	0	1	0	2	3	0	2	0	2	2	#NULL!	#NULL!	#NULL!	#NULL!	#NULL!	#NULL!	#NULL!	#NULL!	#NULL!	#NULL!	#NULL!	#NULL!	#NULL!	#NULL!	#NULL!	#NULL!	#NULL!	#NULL!	#NULL!	#NULL!	#NULL!	#NULL!	#NULL!	#NULL!	#NULL!	#NULL!	#NULL!	#NULL!	#NULL!
43412	female	68	9	0	0	1	1	1	1	1	1	1	3	2	2	2	4	1	2	3	33.8888	0.102341	31.9322	33.8825	36.1689	4.23677	266.085	523.353	46.3328	68.8143	0.44419	1.04594	0.112248	0.250096	0.717692	0.605444	8.49006	6.83028	6.95254	6.24023	0.20446	1.45168	24.371	0.532145	11.324	0.937259	3.87345	3.02515	-4.85162
2018.03.21	female	65	#NULL!	0	0	2	1	1	1	0	1	1	3	2	5	2	4	1	2	3	32.9177	0.110391	30.2648	32.318	35.1236	4.85882	127.658	181.856	19.8528	15.75	0.220734	0.66996	0.080244	0.197701	0.336248	0.256004	3.3438	2.46919	2.17321	1.83143	0.0691964	1.10385	24.2765	0.544613	14.1224	0.997353	3.05231	4.78209	1.34106
43385	female	56	9	0	0	1	1	1	1	1	1	1	3	1	4	3	4	1	0	1	33.4157	0.11072	30.2442	33.7991	36.6605	6.41634	202.509	287.98	38.7851	36.1903	0.61838	0.634288	0.26806	0.517926	0.921966	0.653907	7.76761	5.46457	5.26543	3.92431	0.452242	0.952096	37.8316	0.252142	10.5133	0.965135	6.5989	1.54773	-2.96375
2018.02.10	male	55	#NULL!	0	0	1	1	1	1	1	1	1	2	1	1	0	4	0	2	2	26.1687	0.266541	21.0551	23.4277	34.5134	13.4584	153.608	228.893	40.1946	32.2841	0.11003	0.737946	0.038612	0.075247	0.188772	0.15016	1.50593	1.08607	1.22127	0.856461	0.0306457	0.846436	30.3487	0.293205	9.44898	0.977729	0.980327	12.0251	6.79784
43663	male	63	10	0	0	0	1	1	1	0	1	1	1	3	2	0	2	0	2	2	0.181713	24.8251	27.4775	29.7647	4.93966	396.185	761.033	233.286	656.759	0.236528	1.43687	0.0475001	0.0599022	0.394341	0.346841	8.17574	7.65146	6.21936	6.78437	0.130355	1.92271	28.7616	0.455449	1.41698	9.1121	5.48686	2.45299	-0.181507	-78.3877
2018.04.25	female	59	#NULL!	0	0	2	0	1	1	1	1	1	3	1	3	3	4	1	2	3	31.5331	0.132994	28.3905	31.0481	34.6098	6.21926	177.35	314.363	46.3304	62.8714	0.146184	1.07294	0.0376702	0.0823003	0.225999	0.188329	3.80162	3.39849	2.98895	2.79566	0.0642423	1.79164	26.8379	0.462485	11.7263	0.971715	3.96138	2.91001	4.30097
43810	female	62	7	1	#NULL!	1	1	1	1	1	1	1	0	0	5	2	3	1	2	3	0.155009	25.0065	27.99	30.7899	5.78342	195.266	301.954	81.6532	141.047	0.479112	1.20485	0.036646	0.221643	0.901598	0.864952	9.9683	6.61183	7.50124	5.8715	0.267984	1.52999	16.2628	1.2461	10.0712	1.43832	4.55107	2.97536	-0.472325	-28.9189
2018.04.10	male	79	9	0	0	0	0	1	1	1	1	1	2	2	5	0	4	0	2	2	#NULL!	#NULL!	#NULL!	#NULL!	#NULL!	#NULL!	#NULL!	#NULL!	#NULL!	#NULL!	#NULL!	#NULL!	#NULL!	#NULL!	#NULL!	#NULL!	#NULL!	#NULL!	#NULL!	#NULL!	#NULL!	#NULL!	#NULL!	#NULL!	#NULL!	#NULL!	#NULL!	#NULL!	#NULL!
2018.04.10	male	74	#NULL!	0	0	1	1	1	1	1	1	1	3	2	3	2	4	1	2	3	32.3696	0.17291	27.112	33.2052	37.301	10.189	237.315	383.428	41.0782	36.9013	0.157993	1.07421	0.0532367	0.104511	0.222664	0.169428	3.34161	3.96141	2.86032	3.79115	0.183852	2.01933	25.5436	0.440007	12.474	0.700728	5.62154	1.93541	7.35395
43419	female	62	9	1	0	1	1	1	1	1	0	1	0	0	5	2	4	1	2	3	33.9723	0.117355	31.4098	34.2342	37.1425	5.73269	197.248	363.735	60.3628	166.947	0.622819	0.728313	0.241396	0.496768	0.912138	0.670742	10.4938	10.146	6.28178	4.73883	0.463311	1.05017	37.1248	0.273698	10.9441	0.954923	1.92644	6.09202	-4.5891
43363	female	56	9	0	0	1	1	1	1	1	1	1	3	2	3	2	4	1	2	3	34.115	0.140277	31.6445	34.7778	37.6156	5.97109	345.286	444.433	92.743	258.541	0.349665	0.820647	0.115604	0.246525	0.564996	0.449392	6.17656	5.72726	4.42669	4.60711	0.151606	1.26082	27.1641	0.49203	6.9869	1.53333	-1.08595	-9.68283	-4.1818
2018.01.30	male	#NULL!	#NULL!	0	0	0	1	1	1	0	1	1	3	2	3	2	4	1	2	3	30.5554	0.217102	23.5444	32.2178	36.6513	13.1068	243.081	405.114	52.7492	57.8568	0.084673	0.752784	0.0447464	0.0538619	0.119985	0.0752385	1.33725	1.09122	0.944282	0.830518	0.0290701	1.52198	29.0656	0.301419	11.2622	0.660953	-1.8177	-5.09969	-4.37459
43348	male	77	7	0	0	1	1	1	1	1	1	1	2	2	3	1	4	1	2	3	34.8273	0.163132	30.3409	34.2935	40.2757	9.93473	185.569	283.104	56.2643	109.643	0.111054	1.35948	0.0304618	0.0515859	0.149715	0.119253	3.34702	3.3012	2.45544	2.39726	0.0293783	2.29084	29.4041	0.344882	0.0366654	303.444	7.65115	1.4838	-0.215399
43670	male	63	#NULL!	0	0	0	1	1	1	1	1	1	3	0	0	0	3	0	2	2	0.133895	26.4146	29.3343	32.4567	6.04205	216.804	294.031	55.7095	78.1522	0.197326	1.35257	0.0343089	0.05035	0.345682	0.311373	6.01043	4.14502	4.29073	3.58774	0.0962119	1.79521	27.3336	0.534166	1.28578	12.4379	6.80967	2.11043	-3.91026	-4.57383
2018.01.31	male	63	#NULL!	1	0	1	1	1	1	0	1	1	3	3	5	2	3	1	2	3	30.7534	0.141144	27.4345	29.5841	34.6828	7.24824	188.733	331.204	78.1098	251.557	0.139469	0.756148	0.0456928	0.110851	0.227012	0.181319	2.16065	1.72042	1.36955	1.02786	0.0482464	0.991051	26.8409	0.515122	17.0969	0.741928	8.52736	1.44396	-0.737816
43353	female	63	9	0	0	2	1	1	1	1	0	1	3	1	3	3	4	0	2	2	33.09	0.13951	29.138	33.4138	36.8051	7.66718	268.462	474.283	44.6047	54.1463	0.454987	0.975372	0.127483	0.262164	0.768576	0.641092	8.10654	5.74191	6.49469	5.41489	0.217157	1.3733	26.3471	0.434703	4.63429	2.92871	-1.96038	-5.5067	0.0725669
2018.03.23	female	73	#NULL!	1	0	1	1	1	1	1	1	1	2	2	5	3	4	1	0	1	0	0	0	0	0	0	0	0	0	0	0.064729	0.314222	0.0460269	0.0652204	0.0847962	0.0387693	0	0	-0.0107635	0	0.0155638	0.36981	18.3909	0.130182	16.6047	0.0891514	3.46336	0.851899	6.84894
43530	female	66	12	1	0	2	1	1	1	1	1	1	2	3	4	3	4	0	2	2	34.555	0.11927	30.9693	35.1298	38.0648	7.09556	174.518	248.762	55.8358	82.3527	0.618401	0.673214	0.259972	0.49594	0.935196	0.675225	10.1102	7.00077	7.33253	6.47305	0.449613	1.03691	32.2732	0.335716	9.67707	1.03427	6.85401	1.52014	-4.39708
43388	female	54	9	1	0	1	1	1	1	1	1	1	2	1	3	2	4	1	2	3	34.8007	0.0814147	32.9823	34.5926	37.054	4.07167	141.277	199.361	44.8248	116.605	0.776998	0.695577	0.286872	0.643415	1.19193	0.90506	11.1789	7.4829	8.12174	6.14677	0.605048	1.01586	35.3794	0.261304	9.30944	1.27463	1.96149	6.14107	-9.15119
43420	female	#NULL!	15	1	0	1	1	1	1	1	1	1	3	3	1	2	4	1	2	3	30.1616	0.190175	24.6208	29.379	35.7443	11.1235	148.327	250.89	46.9805	72.2058	0.674162	0.625398	0.309883	0.586459	0.951901	0.642018	10.1416	9.05386	5.86563	5.08488	0.520556	0.956552	35.7342	0.312753	11.7242	0.911359	6.64889	1.7762	-5.7677
43355	female	56	8	0	0	0	1	1	1	1	1	1	3	1	4	2	2	1	2	3	34.4121	0.124517	31.7361	34.498	38.0715	6.33547	230.93	340.779	42.94	37.3912	0.497135	0.88928	0.11616	0.359599	0.811924	0.695763	8.67535	6.04713	6.82368	5.08862	0.265636	1.30192	26.3774	0.561555	5.20486	2.47265	1.62233	8.00662	-4.57968
43328	female	55	15	1	0	1	1	1	1	1	1	1	3	2	4	2	4	1	2	3	34.1011	0.144828	31.0474	34.2652	38.5085	7.46114	408.294	558.62	79.794	106.922	0.57726	0.579572	0.312071	0.493398	0.798252	0.486181	5.551	4.87418	3.37853	2.92183	0.345563	1.10037	31.4694	0.278976	4.87769	1.51785	6.96105	1.12016	-3.47495
43789	female	54	8	0	#NULL!	1	1	1	1	1	1	1	0	0	4	2	4	1	0	1	0.194699	24.9321	31.7198	33.999	9.06689	193.177	235.809	122.707	189.697	0.553346	0.983213	0.05069	0.384991	1.02865	0.977958	10.4106	6.95727	7.34773	5.65953	0.288136	1.23864	22.5129	0.86155	12.4586	1.2296	3.45968	3.92342	2.93156	4.03781
43677	female	62	11	0	0	1	1	1	1	1	1	1	1	0	5	3	4	1	2	3	0.142689	29.4964	32.2247	35.3249	5.82853	211.067	347.11	98.1453	299.303	0.396487	1.17271	0.0497824	0.165766	0.749941	0.700158	9.84156	7.13253	6.95891	5.35568	0.235584	1.56191	29.7385	0.45313	0.197646	71.5277	1.6666	10.107	-14.68	-1.21045
2018.04.24	female	#NULL!	12	0	0	1	0	1	1	1	1	1	3	3	5	2	4	1	0	1	#NULL!	#NULL!	#NULL!	#NULL!	#NULL!	#NULL!	#NULL!	#NULL!	#NULL!	#NULL!	#NULL!	#NULL!	#NULL!	#NULL!	#NULL!	#NULL!	#NULL!	#NULL!	#NULL!	#NULL!	#NULL!	#NULL!	#NULL!	#NULL!	#NULL!	#NULL!	#NULL!	#NULL!	#NULL!
43413	female	78	12	0	0	1	1	1	1	1	1	1	2	3	3	2	3	1	2	3	33.0193	0.140449	29.0923	33.1583	36.6165	7.5241	162.634	244.264	43.3421	43.1918	0.371168	0.900112	0.0885167	0.259115	0.628756	0.540239	6.6337	4.0172	5.06559	4.07947	0.188783	1.20447	26.5963	0.483566	13.2317	0.954712	2.26016	5.07022	-3.49679
43399	female	70	6	0	0	1	1	1	1	1	1	1	2	1	4	2	4	1	2	3	31.9442	0.129431	28.6093	32.0538	36.0876	7.47827	175.825	265.233	22.9988	23.006	0.425879	0.963659	0.105978	0.259391	0.688469	0.582491	7.29455	5.63758	5.22836	3.9472	0.178443	1.18187	30.027	0.418476	10.7889	1.01758	-0.320798	-37.1961	-3.4019
43397	female	62	12	0	0	2	1	1	1	1	1	1	2	3	2	2	4	1	2	3	33.901	0.13808	29.7012	34.973	37.5604	7.85914	258.105	396.725	37.6638	39.1693	0.319321	0.857844	0.116736	0.201167	0.500788	0.384051	5.72927	4.28883	3.83657	2.82265	0.11616	1.27862	21.525	0.551454	5.77111	1.59288	5.04404	2.12246	2.10557
43579	female	56	9	0	0	1	1	1	1	1	1	1	3	2	4	3	4	1	2	3	#NULL!	#NULL!	#NULL!	#NULL!	#NULL!	#NULL!	#NULL!	#NULL!	#NULL!	#NULL!	#NULL!	#NULL!	#NULL!	#NULL!	#NULL!	#NULL!	#NULL!	#NULL!	#NULL!	#NULL!	#NULL!	#NULL!	#NULL!	#NULL!	#NULL!	#NULL!	#NULL!	#NULL!	#NULL!
2018.03.09	female	75	#NULL!	1	0	1	1	1	1	1	1	1	3	2	4	3	4	1	2	3	31.4044	0.161079	27.0265	31.3568	36.0327	9.00615	158.645	225.521	60.0825	90.7314	0.461345	1.19497	0.0726969	0.215257	0.787528	0.714831	9.47175	6.74494	8.64621	6.51418	0.210856	1.38476	22.3479	0.602844	5.57094	2.12889	9.29006	1.41793	11.7826
43405	female	56	12	0	0	2	1	1	1	1	1	1	3	1	5	3	4	1	0	1	36.1465	0.105298	33	36.0992	39.0926	6.09267	215.263	367.486	56.5086	193.643	0.548262	0.881861	0.143304	0.38728	0.899045	0.755741	9.54642	7.19229	6.27072	5.24929	0.268707	1.20636	25.4089	0.579476	9.71017	1.28872	1.60311	8.6894	-5.99538
43356	female	60	12	0	0	2	1	1	1	1	1	1	3	1	5	2	4	1	2	3	33.3022	0.136132	29.3088	33.4462	37.0991	7.7903	191.504	298.491	40.2723	56.2013	0.449765	0.917946	0.120605	0.295153	0.756682	0.636077	8.73857	6.82997	5.86212	4.88297	0.189943	1.38679	24.6651	0.543047	5.97603	1.79911	0.867418	12.3727	-3.05824
43712	female	70	2	1	0	1	1	0	1	1	1	1	1	0	0	0	4	1	0	1	0.198488	24.1221	27.4376	31.9255	7.80335	352.555	607.154	95.3451	127.764	0.128731	1.49356	0.0309841	0.0413719	0.186461	0.155477	4.97055	4.87672	4.54444	6.57232	0.0641425	2.31386	28.2568	0.447053	7.84373	1.81178	4.96806	2.55803	-3.30413	-4.22989
43810	male	68	12	1	#NULL!	2	1	1	1	1	1	1	1	3	2	2	3	1	2	3	0.176879	25.4073	29.5529	33.0016	7.59428	159.172	193.58	117.309	220.236	0.429062	1.31804	0.0201395	0.122884	0.841017	0.820878	11.6418	8.39546	8.12501	6.33288	0.262654	1.66472	15.7591	1.15077	8.37937	1.59525	3.12882	4.40207	3.21131	3.83117
43321	female	68	9	0	0	1	1	1	1	1	1	1	2	3	2	2	4	1	2	3	35.3415	0.162788	29.6899	35.6308	41.6709	11.981	237.381	345.907	44.448	41.2931	0.0542893	0.730572	0.0250823	0.0392652	0.0784241	0.0533418	0.915073	0.745078	0.600254	0.527514	0.0087224	1.08558	24.3228	0.36258	7.27134	1.31075	2.7339	3.12785	6.40331
43565	female	63	12	1	0	2	1	1	1	1	1	1	1	1	5	1	4	1	2	3	0.163163	27.793	31.6261	33.87	6.07703	217.008	279.917	40.9195	25.6404	0.343792	0.620116	0.190915	0.262849	0.451897	0.260982	4.6506	3.95835	2.9258	2.4664	0.187719	1.03769	33.4349	0.26736	8.64576	0.975778	4.72807	1.80514	1.02369	7.54802
2018.03.09	male	66	#NULL!	0	0	1	1	1	1	1	1	1	0	1	3	2	4	1	2	3	31.6497	0.159624	26.9981	32.2777	36.0859	9.0877	304.068	376.289	42.7273	40.1022	0.119842	0.987496	0.0323745	0.0720405	0.193733	0.161358	2.32703	2.07341	2.00459	2.01269	0.0479277	1.21497	21.9545	0.491334	20.4891	0.464945	6.57657	1.58644	0.884914
43333	female	78	6	0	0	1	1	1	1	1	1	1	2	1	1	2	3	0	0	0	36.0093	0.148454	31.0241	36.6724	40.6746	9.65057	171.164	298.458	47.778	35.1033	0.446737	0.659635	0.221917	0.311726	0.666962	0.445045	5.63847	3.92169	3.49876	2.50339	0.256717	0.966412	33.1689	0.221549	3.75535	2.32666	5.6484	1.66516	2.46616
43719	male	65	9	0	0	0	1	1	1	1	1	1	1	3	4	2	4	1	2	3	0.257177	20.5788	23.4474	27.8458	7.26703	314.711	565.52	243.851	554.271	0.146467	1.21849	0.0275314	0.0581059	0.248468	0.220937	3.63065	3.04346	2.59966	2.18779	0.0728237	1.64012	28.0038	0.554344	7.59603	1.80903	5.6335	2.93702	-1.81975	-8.6315
43419	female	69	9	1	0	2	1	1	1	1	1	1	3	2	4	1	4	1	2	3	32.9873	0.110391	29.9982	33.0253	36.1382	6.14003	165.261	267.453	48.2922	68.1341	0.820621	0.695416	0.301807	0.694636	1.21244	0.910629	12.5682	9.51156	8.20411	6.07671	0.59205	0.921333	37.4916	0.237861	7.3514	1.62523	3.76899	2.92176	-6.94816
2018.03.21	female	#NULL!	#NULL!	0	0	0	1	1	1	1	1	1	0	0	2	1	2	0	2	2	#NULL!	#NULL!	#NULL!	#NULL!	#NULL!	#NULL!	#NULL!	#NULL!	#NULL!	#NULL!	#NULL!	#NULL!	#NULL!	#NULL!	#NULL!	#NULL!	#NULL!	#NULL!	#NULL!	#NULL!	#NULL!	#NULL!	#NULL!	#NULL!	#NULL!	#NULL!	#NULL!	#NULL!	#NULL!
43384	female	69	9	1	0	0	1	1	1	1	1	1	0	1	3	2	4	1	2	3	34.2903	0.131321	30.4025	35.1605	38.1855	7.783	204.16	270.608	45.8048	49.9928	0.679048	0.707522	0.238005	0.554037	1.03385	0.795848	9.90325	7.42725	6.88338	5.28193	0.523233	0.990599	37.6903	0.246551	10.6903	0.888084	4.8687	2.21892	-3.60442
43349	female	63	9	0	0	1	1	1	1	1	0	1	2	2	3	3	4	1	0	1	#NULL!	#NULL!	#NULL!	#NULL!	#NULL!	#NULL!	#NULL!	#NULL!	#NULL!	#NULL!	#NULL!	#NULL!	#NULL!	#NULL!	#NULL!	#NULL!	#NULL!	#NULL!	#NULL!	#NULL!	#NULL!	#NULL!	#NULL!	#NULL!	#NULL!	#NULL!	#NULL!	#NULL!	#NULL!
2018.03.29	female	67	#NULL!	0	0	1	1	1	1	1	1	1	1	2	5	2	4	1	2	3	0	0	0	0	0	0	0	0	0	0	0.119971	0.317969	0.0865974	0.129569	0.157682	0.0710841	0.019332	0	0	0	0.0250643	0.517642	18.4938	0.0872081	8.30615	0.504091	3.08615	0.503572	8.00923
2018.04.17	male	75	#NULL!	0	0	0	1	0	1	0	1	1	2	2	0	1	2	0	2	2	29.9424	0.214285	23.683	29.022	36.2011	12.518	292.66	461.753	51.4241	60.8387	0.123971	1.0325	0.0401119	0.0630421	0.193806	0.153694	3.00503	2.40833	2.07223	1.9503	0.0468519	1.56977	22.3293	0.474191	11.323	0.790692	10.2706	0.946846	9.15384
43600	female	72	12	0	0	1	1	1	1	1	1	1	0	3	4	2	4	0	2	2	0	0	0	0	0	0	0	0	0	0.127261	0.163448	0.119225	0.123446	0.128448	0.00922285	0.255744	0.2984	0.0256198	0.0247331	0.0170803	0.217762	11.2739	0.235734	5.6609	0.458425	3.35462	0.830879	-0.766434	-4.18352
2018.04.13	male	76	#NULL!	0	0	1	1	1	1	1	0	1	2	2	5	0	3	0	0	0	33.2943	0.170976	29.3596	33.9952	38.3038	8.94424	261.927	372.368	64.2027	103.68	0.0808225	0.9027	0.0364577	0.0448067	0.118399	0.0819417	1.79048	1.7462	1.16185	1.1214	0.0261543	1.06915	21.9798	0.454561	9.5349	0.926315	1.0645	8.81575	8.997
43326	female	64	12	0	0	2	1	1	1	1	1	1	3	2	3	2	4	0	2	2	35.4422	0.143212	31.1525	36.0848	40.0663	8.9138	212.729	320.93	56.9942	68.0846	0.415746	0.627146	0.198416	0.314244	0.622413	0.423997	5.63798	4.40495	3.18192	2.36242	0.239501	0.917881	34.7729	0.192435	3.90302	1.96411	7.89514	1.3035	5.89153
2018.04.13	male	#NULL!	#NULL!	1	0	1	1	1	1	1	1	1	2	2	4	2	4	1	2	3	31.2219	0.202083	25.5112	31.131	37.4583	11.9472	221.868	371.152	66.8708	106.11	0.105259	0.973742	0.0443253	0.059253	0.149346	0.105021	2.22153	1.84846	1.51392	1.3526	0.0337516	1.20845	25.3102	0.38022	11.8918	0.649763	2.25527	4.10822	-1.00865
43824	female	63	8	0	#NULL!	1	1	1	1	1	1	1	0	2	3	2	4	0	2	2	0.205012	24.1282	26.0233	28.5702	4.44206	368.428	678.5	75.3468	105.212	0.405713	1.21165	0.0429579	0.175756	0.747756	0.704798	8.7948	7.8324	5.3464	5.09604	0.209415	1.65751	18.402	1.04818	8.77909	1.68239	2.62683	4.64395	3.72912	3.0822
43798	female	61	13	1	#NULL!	2	1	1	1	1	1	1	3	3	3	1	4	1	2	3	0.179724	28.0125	32.0844	35.5095	7.497	373.823	594.964	101.785	185.209	0.697912	0.95537	0.0968595	0.498747	1.25759	1.16073	12.696	7.34833	10.7834	6.90433	0.344464	1.12135	18.4511	1.19059	11.0257	1.47322	6.92081	2.33273	0.798576	18.3084
43579	male	60	9	0	0	0	1	1	1	1	1	1	0	2	4	1	3	1	0	1	0.10185	28.8439	30.8191	33.6318	4.78786	83.1236	131.336	33.1403	23.6333	1.20484	0.704003	0.481096	0.957709	1.80614	1.32504	16.8399	13.596	12.7722	12.1761	0.881976	0.999697	28.7188	0.365416	3.63877	2.84333	3.70984	2.54449	-5.66442	-1.78345
2018.03.14	male	74	#NULL!	0	0	0	1	1	1	0	1	1	3	0	5	3	3	0	2	2	31.0909	0.164303	26.8529	30.5965	36.0312	9.1783	185.214	280.334	38.9526	31.5615	0.214643	1.16522	0.0494095	0.10641	0.344615	0.295205	4.61133	4.04064	3.35134	3.04196	0.0728416	1.38233	23.9389	0.501251	13.7411	0.717598	5.7933	2.10851	-0.66993
43398	female	54	9	1	0	1	1	1	1	1	1	1	3	3	2	3	3	1	0	1	34.438	0.100623	31.9615	34.4803	37.138	5.17649	191.077	258.956	39.0602	56.6532	0.372889	0.840313	0.10976	0.27227	0.598787	0.489027	6.93011	5.10841	5.32137	4.17327	0.183208	1.26673	29.2547	0.414503	9.23097	1.11125	-1.03215	-11.1142	-2.85432
43326	male	72	0	0	0	1	1	1	1	1	1	1	2	0	4	2	4	0	2	2	33.3601	0.233201	24.416	35.7974	41.1418	16.7258	321.087	742.923	83.652	183.709	0.0458749	0.825116	0.0223974	0.0267026	0.0666137	0.0442162	0.780429	0.641551	0.539268	0.482567	0.00834961	1.09083	22.4897	0.302534	8.93378	0.974051	4.91205	1.6103	7.97971
2018.02.02	male	#NULL!	#NULL!	0	0	0	1	1	1	1	1	1	2	3	3	3	3	0	2	2	31.821	0.177994	26.9528	31.6897	36.9109	9.95809	191.778	390.122	42.1018	71.2149	0.174495	1.01772	0.0497597	0.0949124	0.285637	0.235877	2.52255	1.98588	2.01136	1.92198	0.058905	1.24505	27.2333	0.340275	9.38337	1.07818	9.20255	1.25209	0.962318
43712	female	57	8	1	0	1	1	1	1	0	1	1	1	0	2	2	4	1	2	3	0.137489	27.1025	31.0665	33.5128	6.41037	189.486	378.884	66.91	111.619	0.260915	1.09126	0.0386192	0.156058	0.457096	0.418477	5.60168	4.27605	4.05221	3.37868	0.142967	1.49452	32.4837	0.447617	10.2823	1.4861	9.30581	1.60533	-11.1246	-1.48155
43663	female	52	6	1	0	1	1	1	1	1	1	1	3	2	3	1	4	1	2	3	0.142656	27.2945	30.815	35.0325	7.73804	178.445	311.095	92.2455	257.958	0.293224	1.31644	0.0618677	0.0898348	0.489812	0.427944	8.26463	6.81968	6.30827	6.04737	0.189084	1.74602	30.2473	0.472195	2.42214	6.34423	4.51421	2.7772	-1.50385	-8.69951
43754	female	61	8	1	0	0	1	1	1	1	1	1	1	0	4	2	4	1	2	3	0.25376	27.9843	33.6796	44.5019	16.5176	216.363	335.993	82.3775	119.279	0.386958	1.13151	0.0952416	0.19085	0.605409	0.510167	10.1264	8.16458	5.85738	5.00732	0.145988	1.65659	17.3073	0.770868	2.60454	5.87826	1.84149	6.85557	-1.89011	-7.75039
43412	female	69	9	0	0	1	1	1	1	1	1	1	3	2	0	2	4	0	2	2	31.7732	0.17834	24.7676	33.2889	36.5561	11.7885	210.344	326.59	81.0333	103.146	0.501364	0.887174	0.13878	0.316885	0.847125	0.708345	8.2287	6.0367	6.2745	4.83456	0.270442	1.28977	28.7169	0.44879	7.96342	1.43261	3.4885	3.84706	5.26535
43397	female	54	8	0	0	1	1	1	1	1	0	1	2	1	1	1	3	1	0	1	33.8028	0.136018	30.2904	34.4917	37.3939	7.1035	186.955	305.503	47.1559	41.1724	0.435559	1.11438	0.0990435	0.218688	0.733131	0.634088	8.33454	5.77319	6.49927	5.27109	0.199574	1.50442	22.4044	0.607727	10.8342	0.968318	2.78467	3.86219	-4.01061
43691	male	67	11	0	0	1	1	1	1	1	1	1	3	2	5	0	4	1	2	3	0.148722	26.7957	29.2962	32.5433	5.74757	173.948	237.072	113.234	401.683	0.222858	1.56045	0.0289606	0.0419069	0.365579	0.336618	8.2429	6.1531	6.04521	4.98117	0.128587	2.05914	31.2029	0.414491	3.66907	3.43086	3.71015	4.17091	-6.02417	-2.73665
2018.02.05	female	58	#NULL!	0	0	1	1	1	1	1	1	1	1	2	5	2	4	1	2	3	35.6619	0.0985468	33.0547	35.804	38.4309	5.37614	180.208	273.183	43.1225	52.596	0.161177	0.880036	0.0635033	0.107076	0.232942	0.169439	2.67714	2.20517	1.98104	2.04968	0.0506348	1.10726	34.0179	0.266986	-2.46867	-3.84678	1.14596	9.03102	-3.10817
43406	female	62	12	1	0	#NULL!	1	1	1	1	1	1	1	2	4	2	4	1	2	3	32.6452	0.0869412	30.4778	32.6345	35.015	4.53725	185.238	316.983	37.9573	60.9383	0.33914	0.879256	0.0956099	0.224814	0.563793	0.468183	6.80032	5.18884	4.86775	3.73153	0.144986	1.35352	25.7976	0.575363	10.5266	1.02455	5.99093	1.59294	-0.673911
[truncated: 62 more columns]
